# Supplementary material for: Multiple Organ Dysfunction Syndrome in Malawian Children with Cerebral Malaria
Source: PubMed Central journal article supplement (PMC11619499; doi:10.4269/ajtmh.24-0303), 2024-10-08
Supplement: tpmd240303.SD1.pdf [file tpmd240303.SD1.pdf]

## Supplemental Tables

Supplemental Table 1. Pediatric Logistic Organ Dysfunction-2 (PELOD-2) Score with study modifications

| Organ Dysfunction and Variables                      | Points by Severity Levels |          |        |            |      |   |      |
|------------------------------------------------------|---------------------------|----------|--------|------------|------|---|------|
|                                                      | 0                         | 1        | 2      | 3          | 4    | 5 | 6    |
| <b>Neurologic</b>                                    |                           |          |        |            |      |   |      |
| <b>Glasgow Coma Score</b>                            | ≥ 11                      | 5-10     |        |            | 3-4  |   |      |
| <b>Or</b>                                            |                           |          |        |            |      |   |      |
| <b>Blantyre Coma Score<sup>α</sup></b>               | 4-5                       | 1-3      |        |            | 0    |   |      |
| <b>Pupillary reaction</b>                            | Both reactive             |          |        | Both fixed |      |   |      |
| <b>Cardiovascular</b>                                |                           |          |        |            |      |   |      |
| <b>Lactatemia (mmol/L)</b>                           | < 5.0                     | 5.0-10.9 |        |            | ≥ 11 |   |      |
| <b>Mean arterial pressure (mmHg)</b>                 |                           |          |        |            |      |   |      |
| 0 to <1 month                                        | ≥ 46                      |          | 31-45  | 17-30      |      |   | ≤ 16 |
| 1 – 11 months                                        | ≥ 55                      |          | 39-54  | 25-38      |      |   | ≤ 24 |
| 12 – 23 months                                       | ≥ 60                      |          | 44-59  | 31-43      |      |   | ≤ 30 |
| 24 – 59 months                                       | ≥ 62                      |          | 46-61  | 32-44      |      |   | ≤ 31 |
| 60 – 143 months                                      | ≥ 65                      |          | 49-64  | 36-48      |      |   | ≤ 35 |
| ≥ 144 months                                         | ≥ 67                      |          | 52-66  | 38-51      |      |   | ≤ 37 |
| <b>Renal</b>                                         |                           |          |        |            |      |   |      |
| <b>Creatinine (mg/dL)<sup>β</sup></b>                |                           |          |        |            |      |   |      |
| 0 to <1 month                                        | ≤ 0.78                    |          | ≥ 0.79 |            |      |   |      |
| 1 – 11 months                                        | ≤ 0.25                    |          | ≥ 0.26 |            |      |   |      |
| 12 – 23 months                                       | ≤ 0.38                    |          | ≥ 0.39 |            |      |   |      |
| 24 – 59 months                                       | ≤ 0.57                    |          | ≥ 0.58 |            |      |   |      |
| 60 – 143 months                                      | ≤ 0.66                    |          | ≥ 0.67 |            |      |   |      |
| ≥ 144 months                                         | ≤ 1.04                    |          | ≥ 1.05 |            |      |   |      |
| <b>Respiratory</b>                                   |                           |          |        |            |      |   |      |
| <b>SpO<sub>2</sub> / FiO<sub>2</sub><sup>γ</sup></b> | ≥ 100                     |          | ≤ 100  |            |      |   |      |
| <b>PaCO<sub>2</sub> (mmHg)</b>                       | ≤ 58                      | 59-94    |        | ≥ 95       |      |   |      |
| <b>Invasive Ventilation</b>                          | No                        |          |        | Yes        |      |   |      |
| <b>Hematologic</b>                                   |                           |          |        |            |      |   |      |
| <b>WBC Count (x10<sup>9</sup>/L)</b>                 | > 2                       |          | ≤ 2    |            |      |   |      |
| <b>Platelets (x10<sup>9</sup>/L)</b>                 | ≥ 142                     | 77-141   | ≤ 76   |            |      |   |      |

mmol = millimole; L = liter; mmHg = millimeters of mercury; mg = milligram; dL = deciliter; SpO<sub>2</sub> = oxygen saturation; FiO<sub>2</sub> = fraction of inspired oxygen; PaCO<sub>2</sub> = partial pressure of carbon dioxide; WBC = white blood cell

The following adjustments were made in this study: <sup>α</sup> Glasgow Coma Score converted into clinically equivalent Blantyre Coma Score;<sup>26,31</sup> Creatinine converted from μmol/L to mg/dL; SpO<sub>2</sub>/FiO<sub>2</sub> ratio applied instead of PaO<sub>2</sub>/FiO<sub>2</sub> ratio<sup>52,53</sup>

Supplemental Table 2. Pediatric Sequential Organ Failure Assessment (pSOFA) Score with study modifications

| Organ Dysfunction and Variables           | Points by Severity Levels |           |                                                             |                                                                                 |                                                                                  |
|-------------------------------------------|---------------------------|-----------|-------------------------------------------------------------|---------------------------------------------------------------------------------|----------------------------------------------------------------------------------|
|                                           | 0                         | 1         | 2                                                           | 3                                                                               | 4                                                                                |
| <b>Respiratory</b>                        |                           |           |                                                             |                                                                                 |                                                                                  |
| <b>PaO<sub>2</sub>:FiO<sub>2</sub></b>    | ≥400                      | 300-399   | 200-299                                                     | 100-199 with respiratory support                                                | <100 with respiratory support                                                    |
| <b>Or</b>                                 |                           |           |                                                             |                                                                                 |                                                                                  |
| <b>SpO<sub>2</sub>:FiO<sub>2</sub></b>    | ≥292                      | 264-291   | 221-264                                                     | 148-220 with respiratory support                                                | <148 with respiratory support                                                    |
| <b>Coagulation</b>                        |                           |           |                                                             |                                                                                 |                                                                                  |
| <b>Platelet count x 10<sup>3</sup>/μL</b> | ≥150                      | 100-149   | 50-99                                                       | 20-49                                                                           | <20                                                                              |
| <b>Hepatic</b>                            |                           |           |                                                             |                                                                                 |                                                                                  |
| <b>Bilirubin mg/dL</b>                    | <1.2                      | 1.2 - 1.9 | 2.0 - 5.9                                                   | 6.0 - 11.9                                                                      | >12.0                                                                            |
| <b>Cardiovascular</b>                     |                           |           |                                                             |                                                                                 |                                                                                  |
| <b>Mean arterial pressure (mmHg)</b>      |                           |           |                                                             |                                                                                 |                                                                                  |
| <1 months                                 | ≥46                       | <46       | Dopamine hydrochloride ≤5 or dobutamine hydrochloride (any) | Dopamine hydrochloride >5 or epinephrine ≤0.1 or norepinephrine bitartrate ≤0.1 | Dopamine hydrochloride >15 or epinephrine >0.1 or norepinephrine bitartrate >0.1 |
| 1-11 months                               | ≥55                       | <55       |                                                             |                                                                                 |                                                                                  |
| 12-23 months                              | ≥60                       | <60       |                                                             |                                                                                 |                                                                                  |
| 24-59 months                              | ≥62                       | <62       |                                                             |                                                                                 |                                                                                  |
| 60-143 month                              | ≥65                       | <65       |                                                             |                                                                                 |                                                                                  |
| 144-216 months                            | ≥67                       | <67       |                                                             |                                                                                 |                                                                                  |
| >216 months                               | ≥70                       | <70       |                                                             |                                                                                 |                                                                                  |
| <b>Neurologic</b>                         |                           |           |                                                             |                                                                                 |                                                                                  |
| <b>Glasgow Coma Score</b>                 | 15                        | 13-14     | 10-12                                                       | 6-9                                                                             | <6                                                                               |
| <b>Or</b>                                 |                           |           |                                                             |                                                                                 |                                                                                  |
| <b>Blantyre Coma Score<sup>a</sup></b>    | 5                         | 4         | 3                                                           | 1-2                                                                             | 0                                                                                |
| <b>Renal</b>                              |                           |           |                                                             |                                                                                 |                                                                                  |
| <b>Creatinine mg/dL</b>                   |                           |           |                                                             |                                                                                 |                                                                                  |
| <1 months                                 | <0.8                      | 0.8-0.9   | 1.0-1.1                                                     | 1.2-1.5                                                                         | ≥1.6                                                                             |
| 1-11 months                               | <0.3                      | 0.3-0.4   | 0.5-0.7                                                     | 0.8-1.1                                                                         | ≥1.2                                                                             |
| 12-23 months                              | <0.4                      | 0.4-0.5   | 0.6-1.0                                                     | 1.1-1.4                                                                         | ≥1.5                                                                             |
| 24-59 months                              | <0.6                      | 0.6-0.8   | 0.9-1.5                                                     | 1.6-2.2                                                                         | ≥2.3                                                                             |
| 60-143 month                              | <0.7                      | 0.7-1.0   | 1.1-1.7                                                     | 1.8-2.5                                                                         | ≥2.6                                                                             |
| 144-216 months                            | <1.0                      | 1.0-1.6   | 1.7-2.8                                                     | 2.9-4.1                                                                         | ≥4.2                                                                             |
| >216 months                               | <1.2                      | 1.2-1.9   | 2.0-3.4                                                     | 3.5-4.9                                                                         | ≥5                                                                               |

PaO<sub>2</sub> = partial pressure of oxygen; FiO<sub>2</sub> = fraction of inspired oxygen; SpO<sub>2</sub> = peripheral capillary oxygen saturation; μL = microliter; mg = milligram; dL = deciliter; mmHg = millimeters of mercury,

The following adjustments were made for this study: <sup>a</sup>Glasgow Coma Score converted into clinically equivalent Blantyre Coma Score

Supplemental Table 3. Signs of Inflammation in Children that Can Kill (SICK) Score with study modifications

| Organ Dysfunction and Variables         | Score                                           |                                                 |
|-----------------------------------------|-------------------------------------------------|-------------------------------------------------|
|                                         | 0 points                                        | 1 point                                         |
| Temperature                             | 36°C -38°C                                      | <36°C or >38°C                                  |
| <b>Cardiovascular<sup>a</sup></b>       |                                                 |                                                 |
| Heart Rate                              | Infant ≤160 per minute<br>Child ≤150 per minute | Infant >160 per minute<br>Child >150 per minute |
| Systolic blood pressure                 | Infant ≥65 mmHg<br>Child ≥75 mmHg               | Infant <65 mmHg<br>Child <75 mmHg               |
| Capillary refill time                   | <3 seconds                                      | ≥3 seconds                                      |
| <b>Respiratory<sup>a</sup></b>          |                                                 |                                                 |
| Respiratory rate                        | Infant ≤60 per minute<br>Child ≤ 50 per minute  | Infant >60 per minute<br>Child > 50 per minute  |
| SpO <sub>2</sub>                        | ≥90%                                            | <90%                                            |
| <b>Neurologic<sup>a</sup></b>           |                                                 |                                                 |
| Alert, Voice, Pain, Unresponsive (AVPU) | A                                               | V, P, or U                                      |
| Or                                      |                                                 |                                                 |
| Blantyre Coma Score <sup>b</sup>        | 5                                               | 0-4                                             |

C = Celsius; mmHg = millimeters of mercury; SpO<sub>2</sub> = oxygen saturation.

The following adjustments were made in this study: <sup>a</sup>Scoring system variables were divided into organ specific categories; <sup>b</sup>AVPU converted into clinically equivalent Blantyre Coma Score

Supplemental Table 4. The Lambaréné Organ Dysfunction Score with study modifications

| Organ Dysfunction and Variables                                                           | Score    |         |
|-------------------------------------------------------------------------------------------|----------|---------|
|                                                                                           | 0 points | 1 point |
| <b>Neurologic<sup>a</sup></b>                                                             |          |         |
| Coma<br>Blantyre Coma Score $\leq 2$                                                      | No       | Yes     |
| Prostration<br>Unable to breastfeed, sit, stand, or<br>walk independently (age dependent) | No       | Yes     |
| <b>Respiratory<sup>a</sup></b>                                                            |          |         |
| Deep Breathing                                                                            | No       | Yes     |

The following adjustment was made in this study: <sup>a</sup>Scoring system variables were divided into organ specific categories

Supplemental Table 5. Missing variables for each scoring system

| Variable                             | Total Missing* (%) |
|--------------------------------------|--------------------|
| Age (months)                         | 0 (0)              |
| PELOD-2                              |                    |
| Blantyre Coma Score                  | 0 (0)              |
| Pupillary Reaction                   | 0 (0)              |
| Lactate                              | 3 (1.5)            |
| Systolic blood pressure              | 0 (0)              |
| Diastolic blood pressure             | 0 (0)              |
| Creatinine                           | 26 (13)            |
| Oxygen saturation                    | 0 (0)              |
| Amount of supplemental oxygen (FiO2) | 0 (0)              |
| PaCO2                                | 60 (30)            |
| Mechanical ventilation               | 0 (0)              |
| White blood cell count               | 4 (2)              |
| Platelet count                       | 4 (2)              |
| pSOFA                                |                    |
| Oxygen saturation                    | 0 (0)              |
| Amount of supplemental oxygen (FiO2) | 0 (0)              |
| Platelet count                       | 4 (2)              |
| Total bilirubin                      | 80 (40)            |
| Systolic blood pressure              | 0 (0)              |
| Diastolic blood pressure             | 0 (0)              |
| Blantyre Coma Score                  | 0 (0)              |
| Creatinine                           | 26 (13)            |
| SICK                                 |                    |
| Temperature                          | 0 (0)              |
| Heart Rate                           | 0 (0)              |
| Systolic blood pressure              | 0 (0)              |
| Diastolic blood pressure             | 0 (0)              |
| Capillary refill time                | 0 (0)              |
| Respiratory rate                     | 1 (0.5)            |
| Oxygen saturation                    | 0 (0)              |
| Reactive to pain                     | 0 (0)              |
| LODS                                 |                    |
| Coma                                 | 0 (0)              |
| Prostration                          | 0 (0)              |
| Deep breathing                       | 0 (0)              |

PELOD-2 = Pediatric Logistic Organ Dysfunction-2; FiO2 = fraction of inspired oxygen; PaCO2 = partial pressure of carbon dioxide; pSOFA = Pediatric Sequential Organ Failure Assessment; SICK = Signs of Inflammation in Children that Can Kill; LODS = Lambaréné Organ Dysfunction Score

\*N = 199
